# Supplementary material for: Schiff bases targeting an Sw-480 colorectal cell line: synthesis, characterization, ds-DNA binding and anticancer studies
Source: Royal Society of Chemistry journal article supplement (doi:10.1039/d4ra06962e), 2025-01-01
Supplement: d4ra06962e2.pdf [file d4ra06962e2.pdf]

# HSB-1

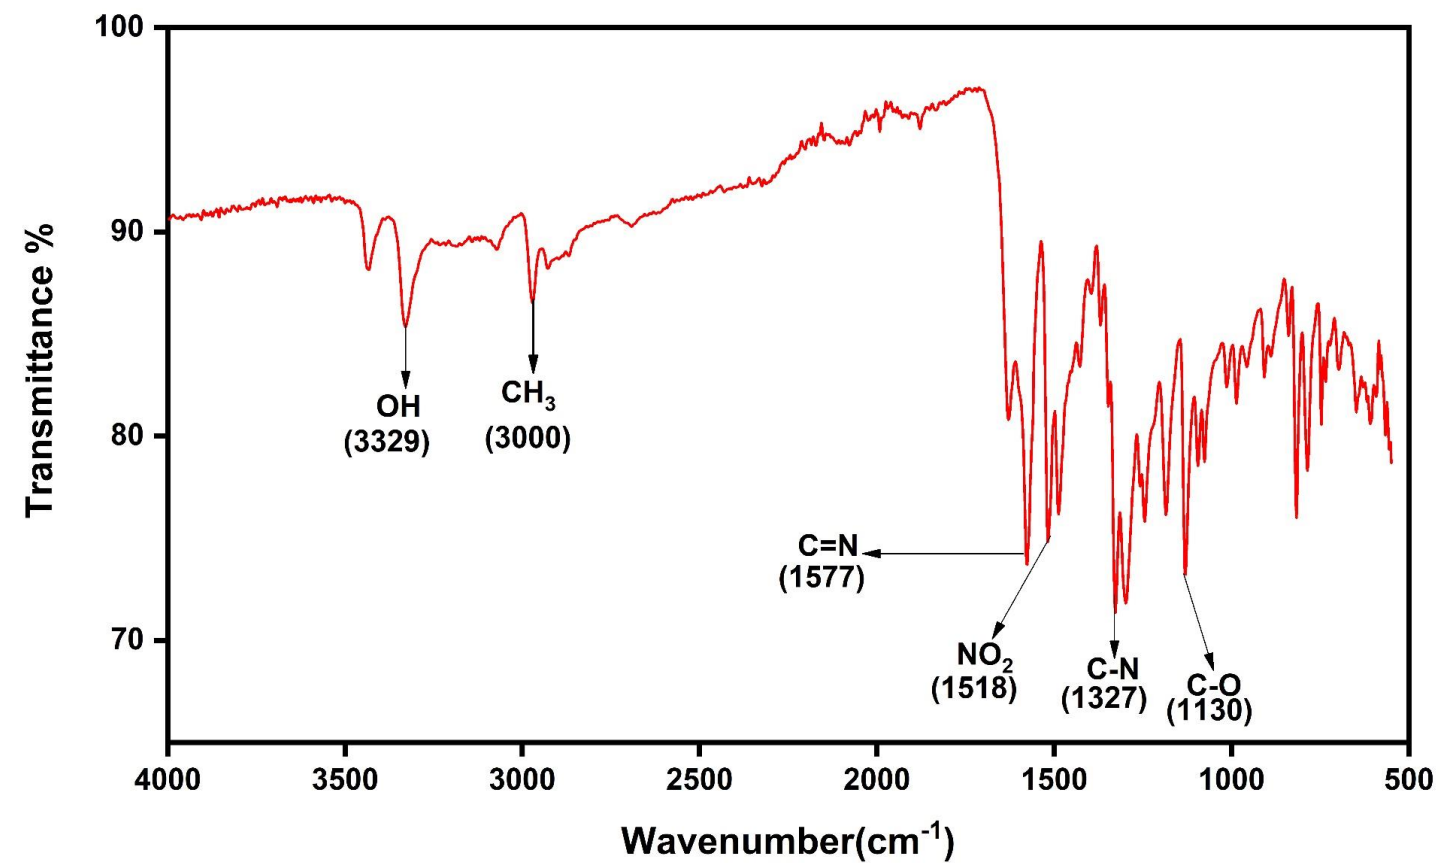

Fourier Transform Infrared (FTIR) spectrum of HSB-1

# HSB-2

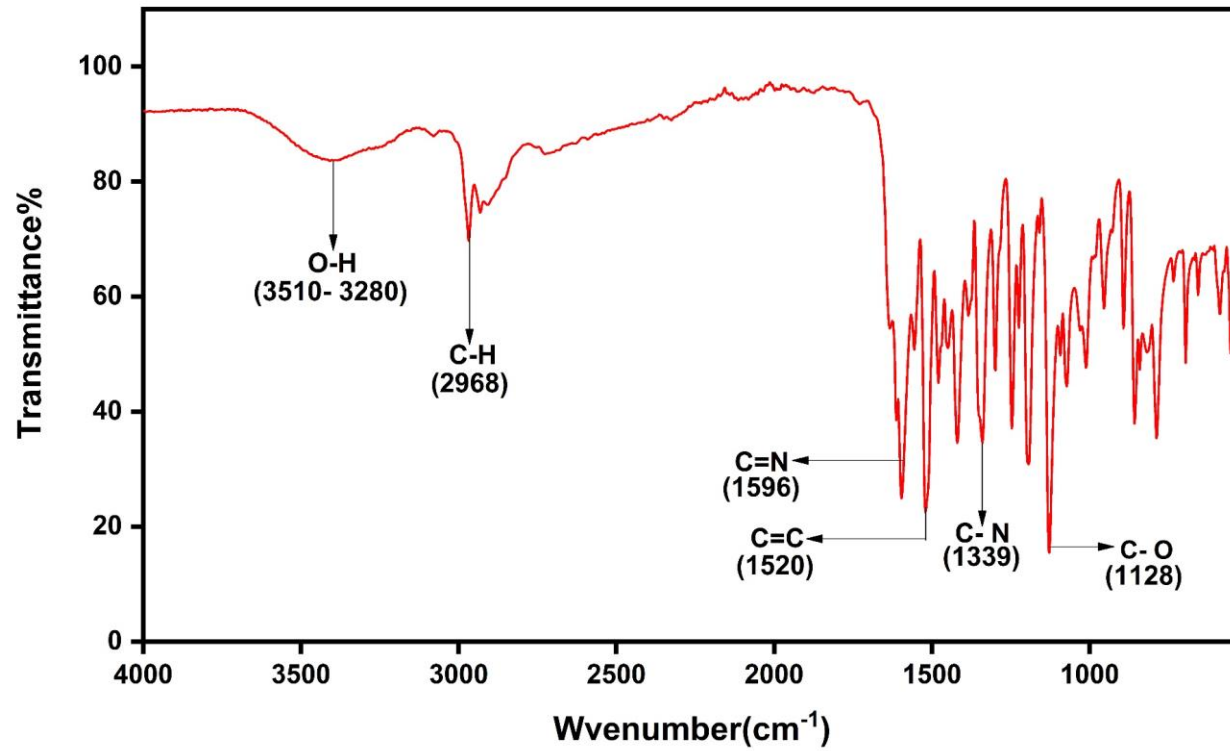

Fourier Transform Infrared (FTIR) spectrum of HSB-2

# HSB-3

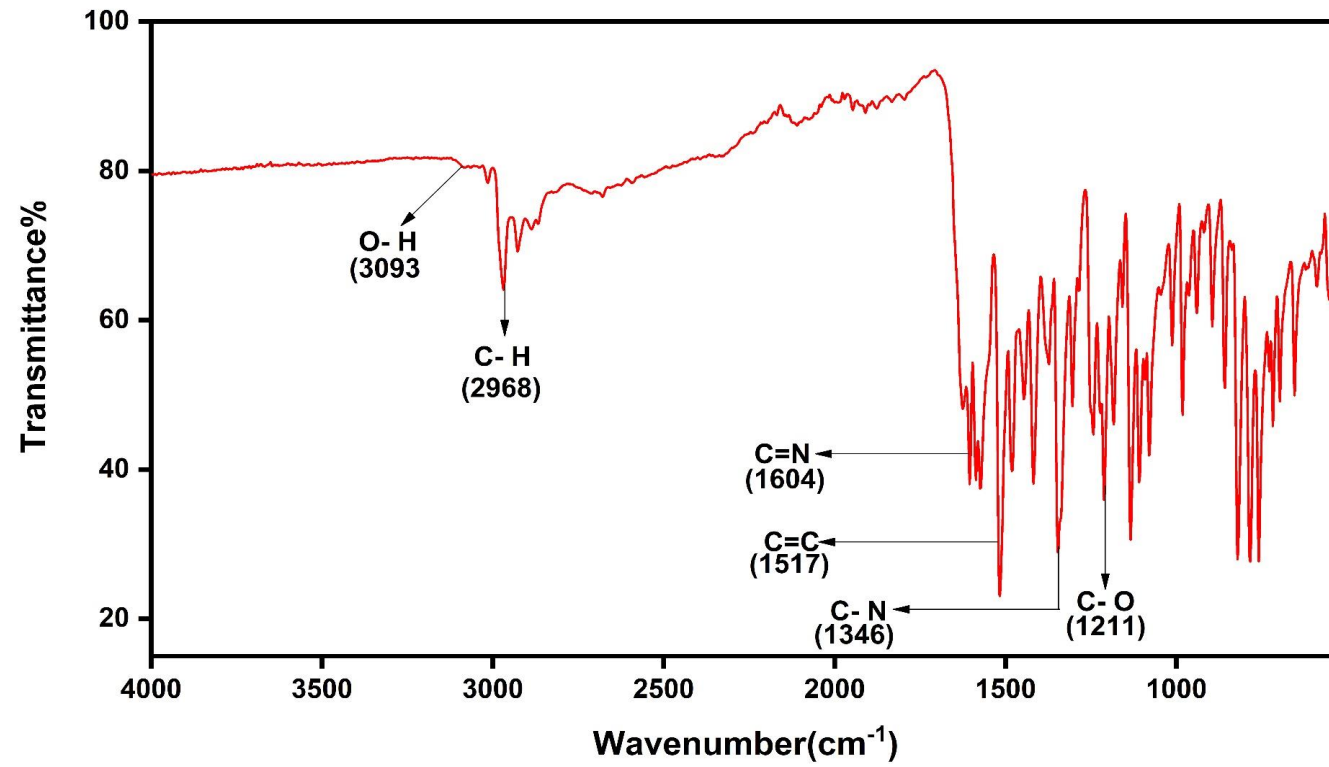

Fourier Transform Infrared (FTIR) spectrum of HSB-3

# HSB-4

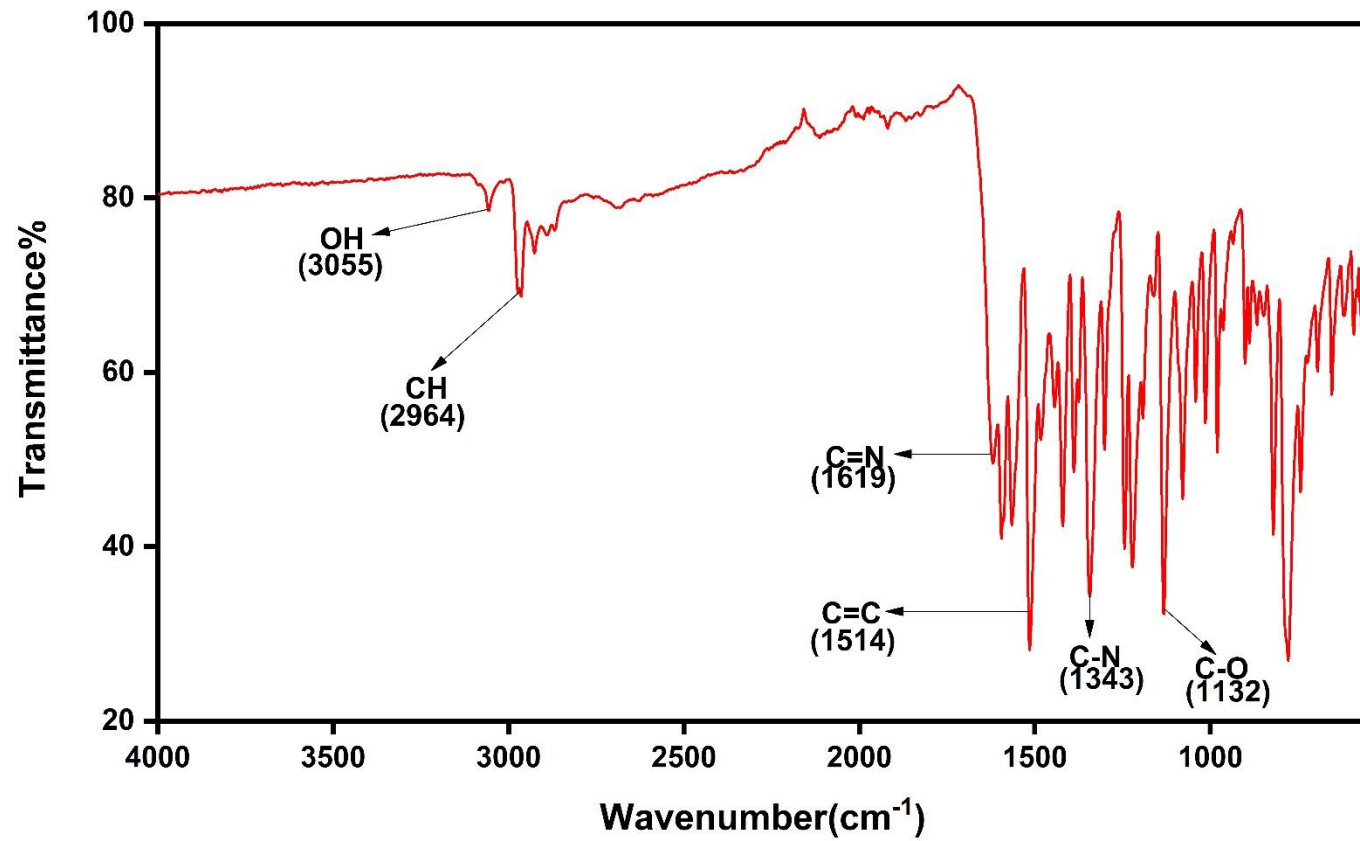

Fourier Transform Infrared (FTIR) spectrum of HSB-4

# HSB-5

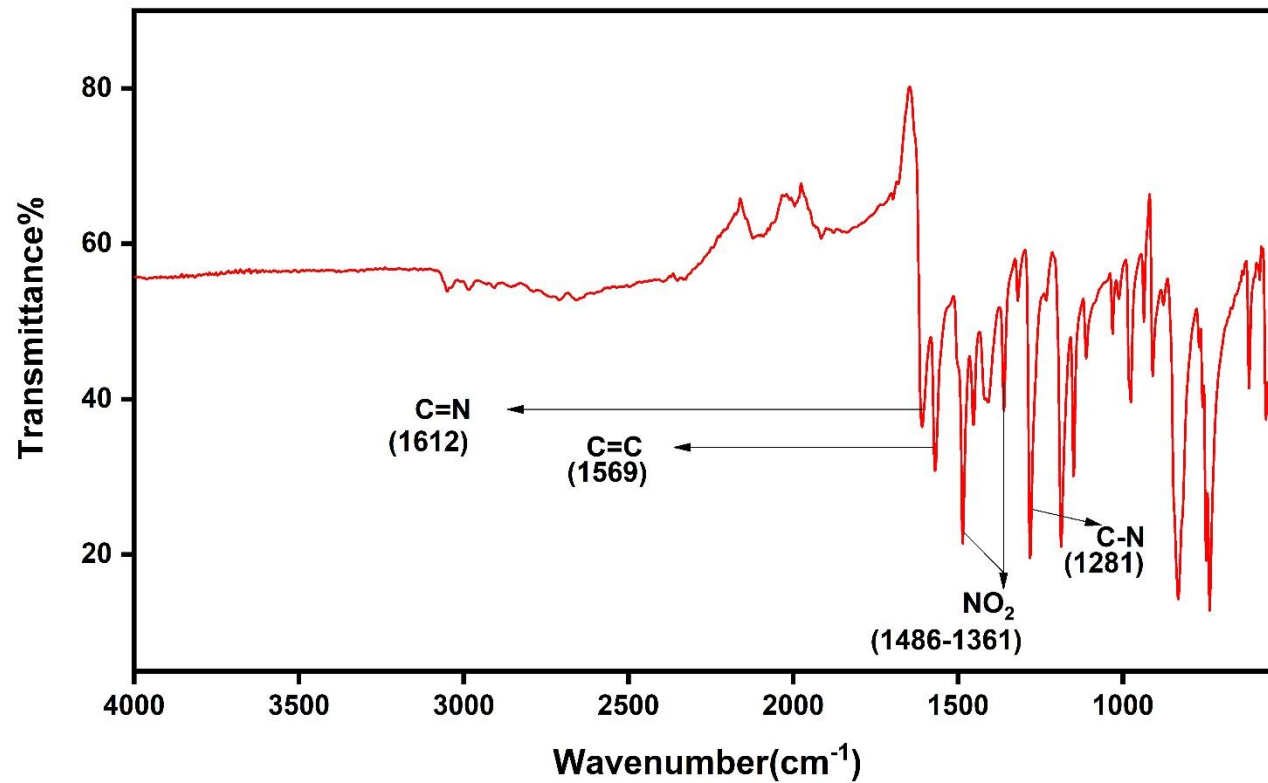

Fourier Transform Infrared (FTIR) spectrum of HSB-5

# HSB-6

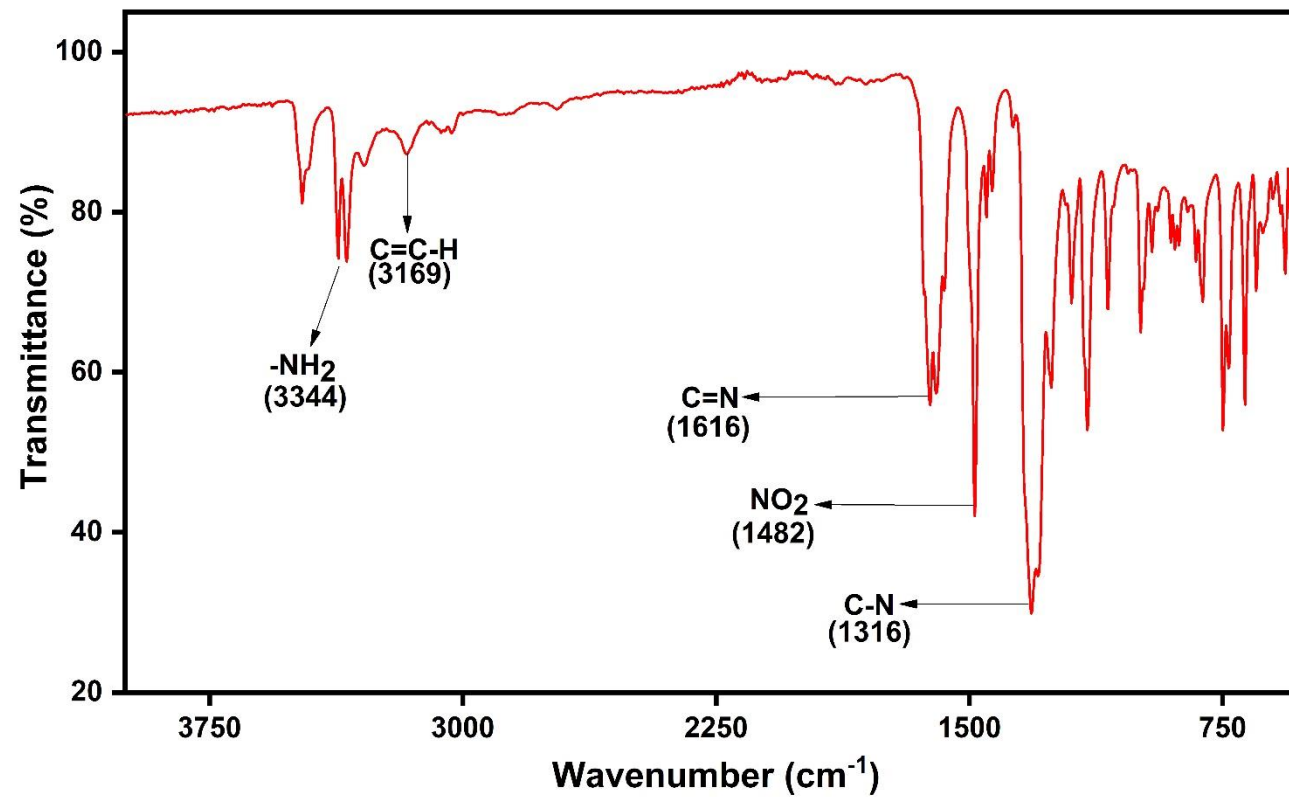

Fourier Transform Infrared (FTIR) spectrum of HSB-6

# HSB-1

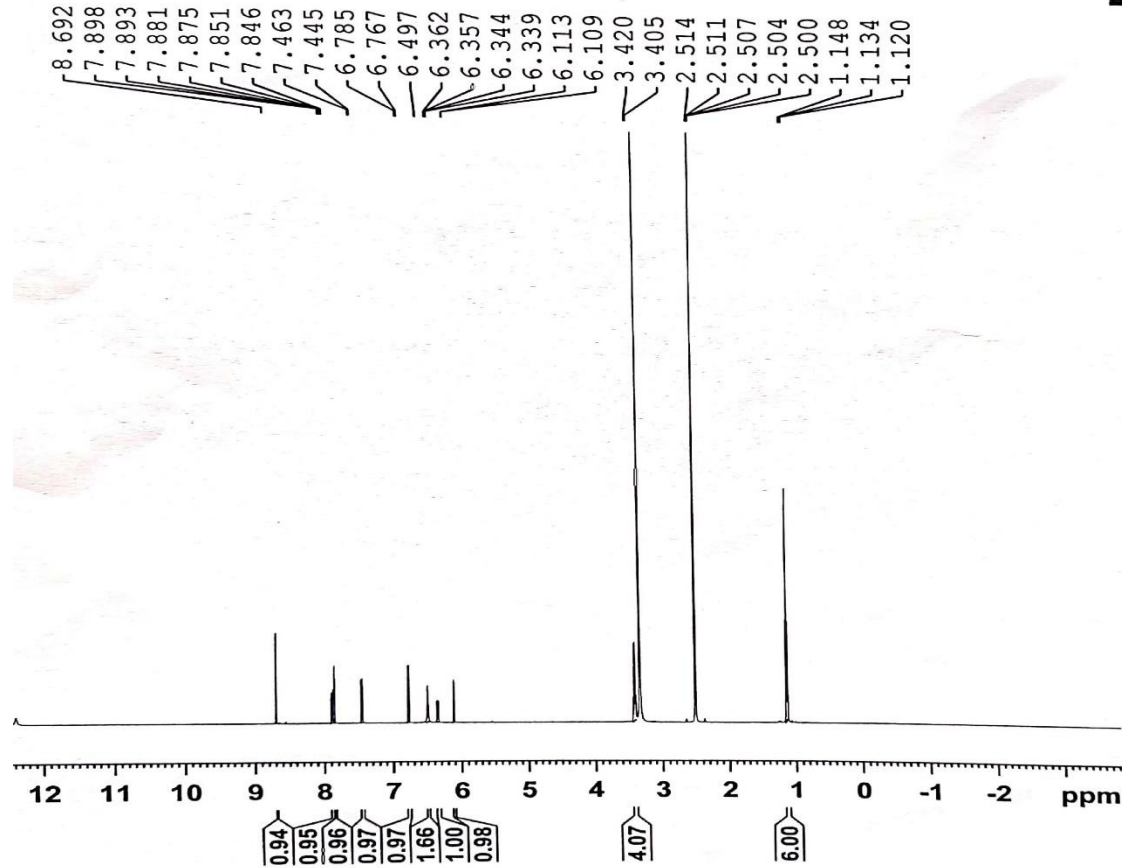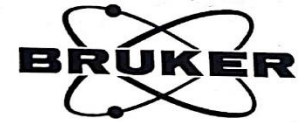

Current Data Parameters  
NAME 20220325-01  
EXPNO 1  
PROCNO 1

F2 - Acquisition Parameters  
Date\_ 20220325  
Time 9.37 h  
INSTRUM spect  
PROBHD z119470\_0240 (  
PULPROG zg30  
TD 65536  
SOLVENT DMSO  
NS 16  
DS 2  
SWH 10000.000 Hz  
FIDRES 0.305176 Hz  
AQ 3.2767999 sec  
RG 122.17  
DW 50.000 usec  
DE 6.50 usec  
TE 298.0 K  
D1 1.00000000 sec  
TDO 1  
SFO1 500.2930893 MHz  
NUC1 1H  
P1 10.00 usec  
PLW1 20.81399918 W

F2 - Processing parameters  
SI 65536  
SF 500.2900000 MHz  
WDW EM  
SSB 0  
LB 0.30 Hz  
GB 0  
PC 1.00

<sup>1</sup>H-NMR spectrum of HSB-1

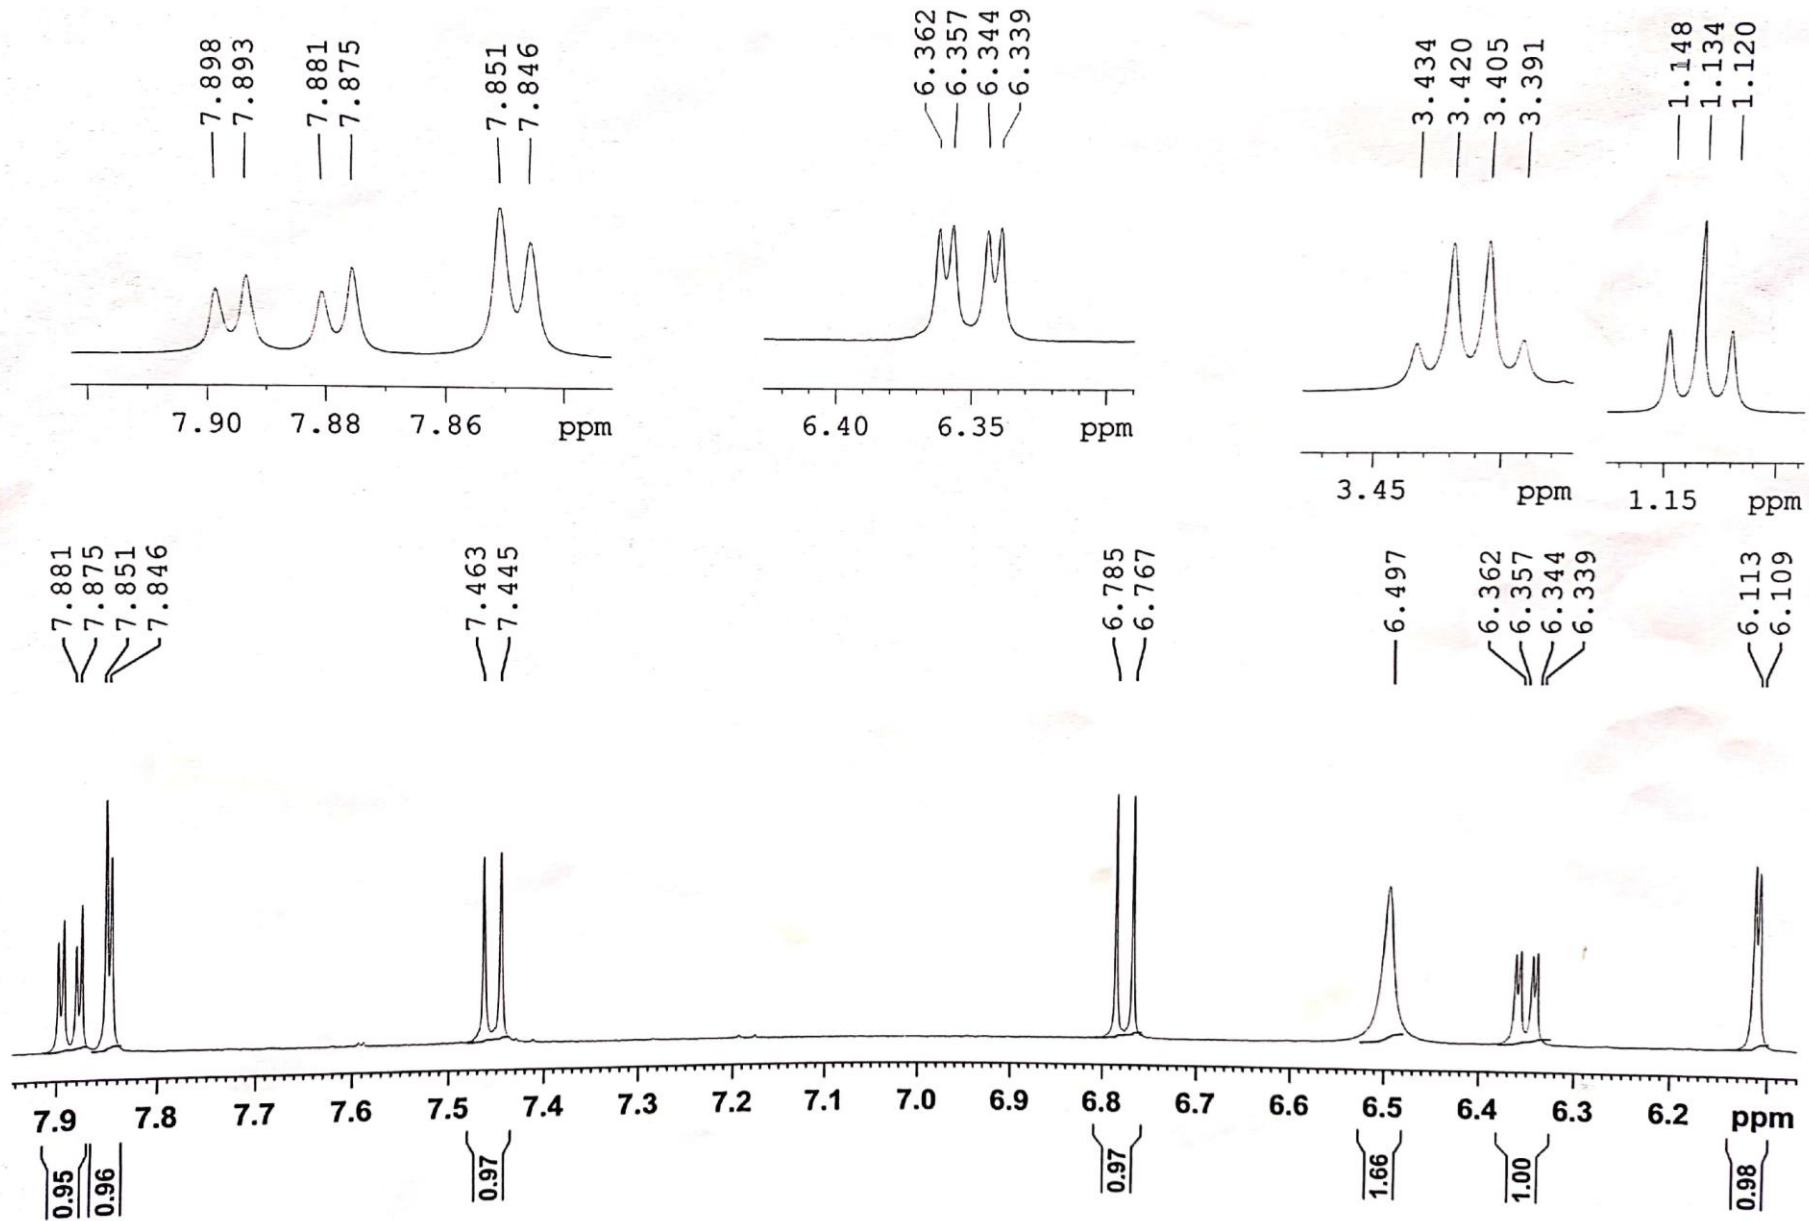

**$^1\text{H-NMR}$  expanded spectrum of HSB-1**



# HSB-2

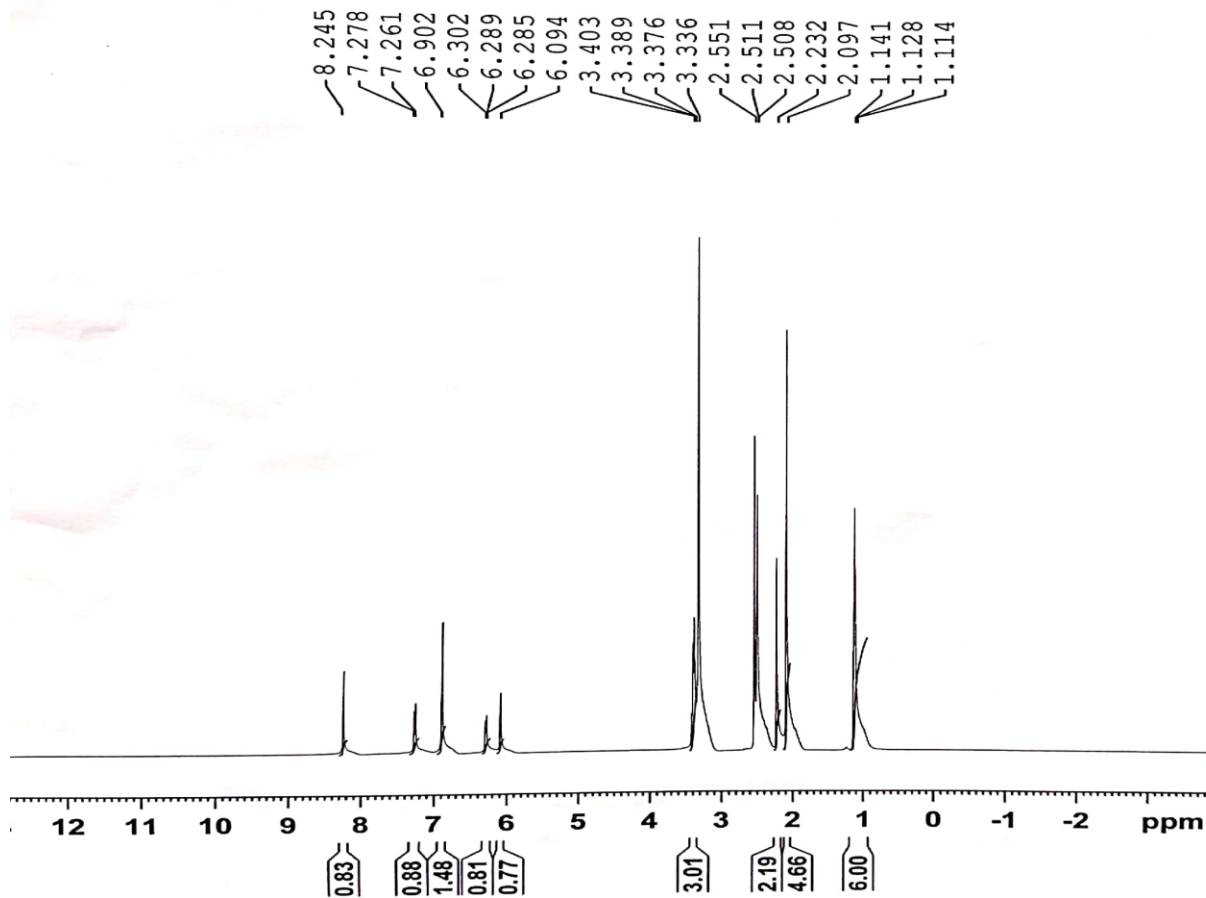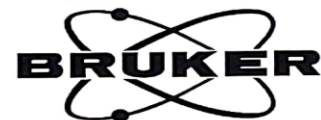

Current Data Parameters  
NAME 20220325-04  
EXPNO 1  
PROCNO 1

F2 - Acquisition Parameters  
Date\_ 20220325  
Time\_ 10.03 h  
INSTRUM spect  
PROBHD z119470\_0240 ( )  
PULPROG zg30  
TD 65536  
SOLVENT DMSO  
NS 16  
DS 2  
SWH 10000.000 Hz  
FIDRES 0.305176 Hz  
AQ 3.2767999 sec  
RG 122.17  
DW 50.000 usec  
DE 6.50 usec  
TE 298.0 K  
D1 1.00000000 sec  
TDO 1  
SFO1 500.2930893 MHz  
NUC1 1H  
P1 10.00 usec  
PLW1 20.81399918 W

F2 - Processing parameters  
SI 65536  
SF 500.2900000 MHz  
WDW EM  
SSB 0  
LB 0.30 Hz  
GB 0  
PC 1.00

<sup>1</sup>H-NMR spectrum of HSB-2

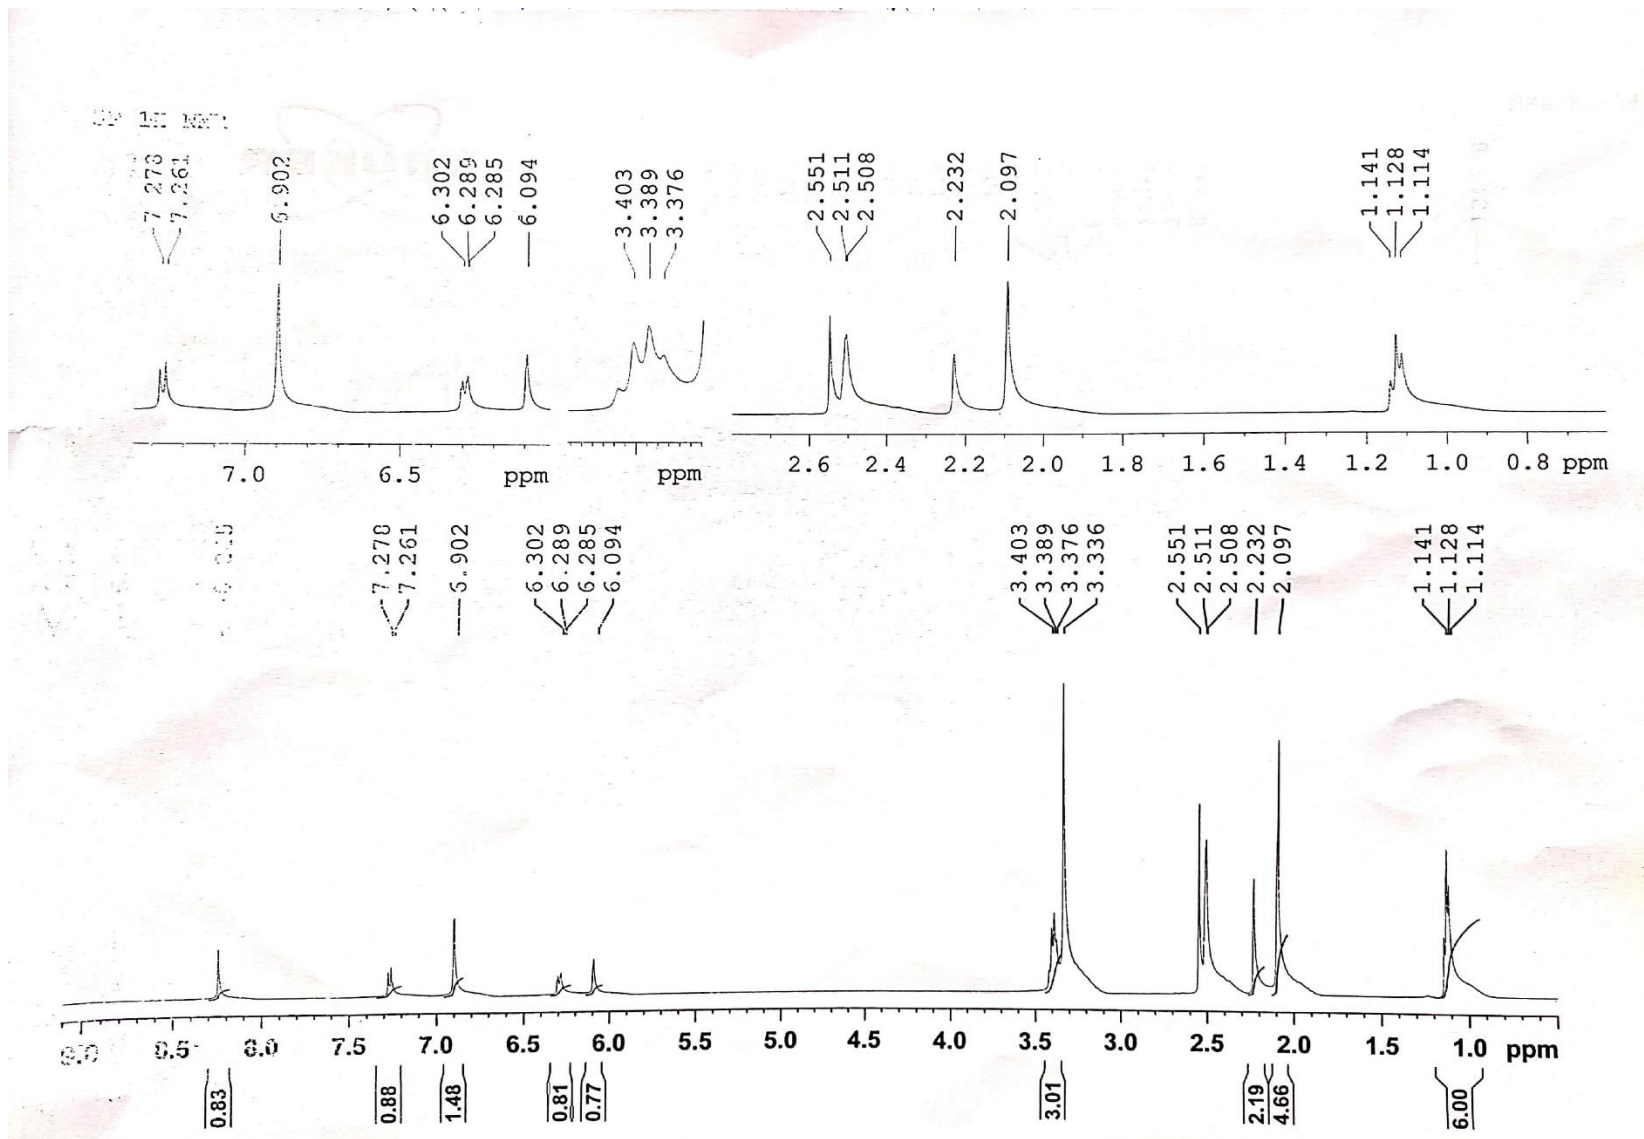

$^1\text{H-NMR}$  expanded spectrum of HSB-2

# HSB-3

2

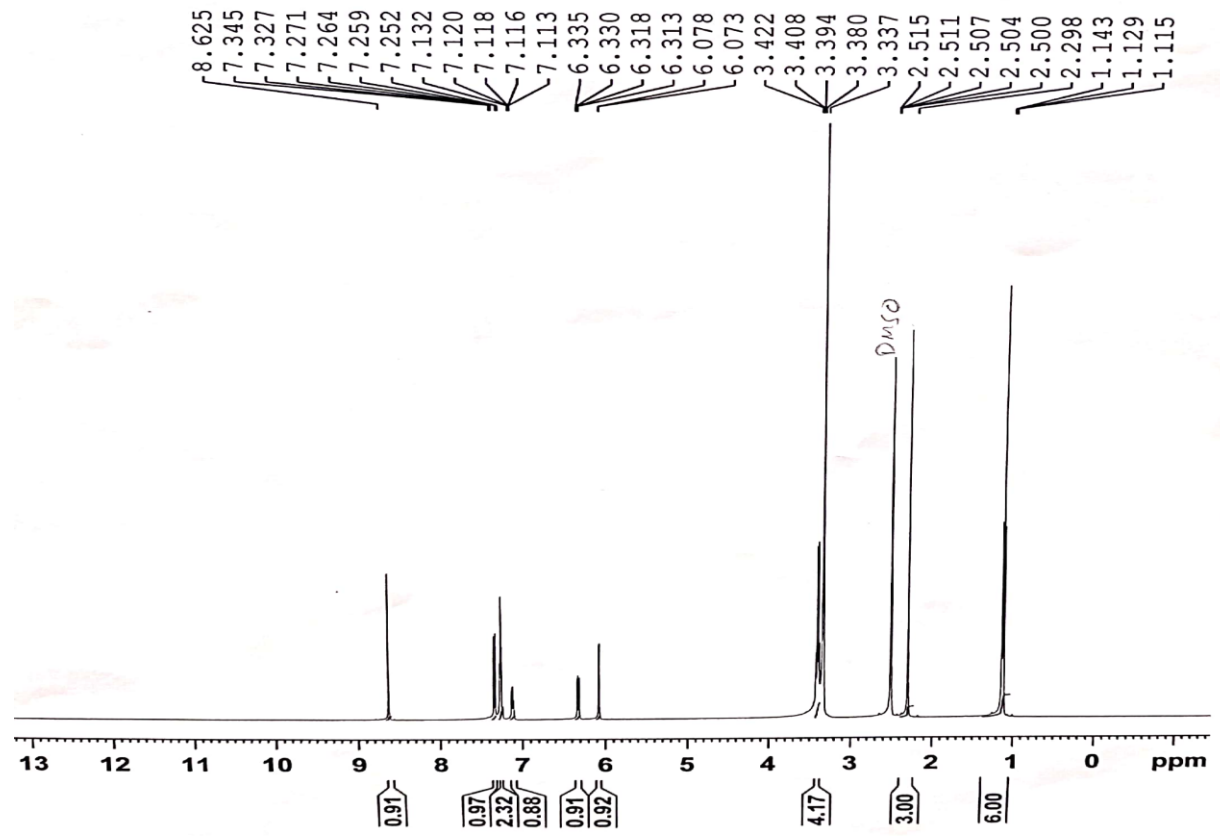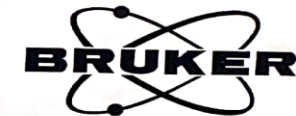

Current Data Parameters  
NAME 20220325-02  
EXPNO 1  
PROCNO 1

F2 - Acquisition Parameters  
Date\_ 20220325  
Time 9.46 h  
INSTRUM spect  
PROBHD Z119470\_0240 (  
PULPROG zg30  
TD 65536  
SOLVENT DMSO  
NS 16  
DS 2  
SWH 10000.000 Hz  
FIDRES 0.305176 Hz  
AQ 3.2767999 sec  
RG 122.17  
DW 50.000 usec  
DE 6.50 usec  
TE 298.0 K  
D1 1.00000000 sec  
TDO 1  
SFO1 500.2930893 MHz  
NUC1 1H  
P1 10.00 usec  
PLW1 20.81399918 W

F2 - Processing parameters  
SI 65536  
SF 500.2900000 MHz  
WDW EM  
SSB 0  
LB 0.30 Hz  
GB 0  
PC 1.00

<sup>1</sup>H-NMR spectrum of HSB-3

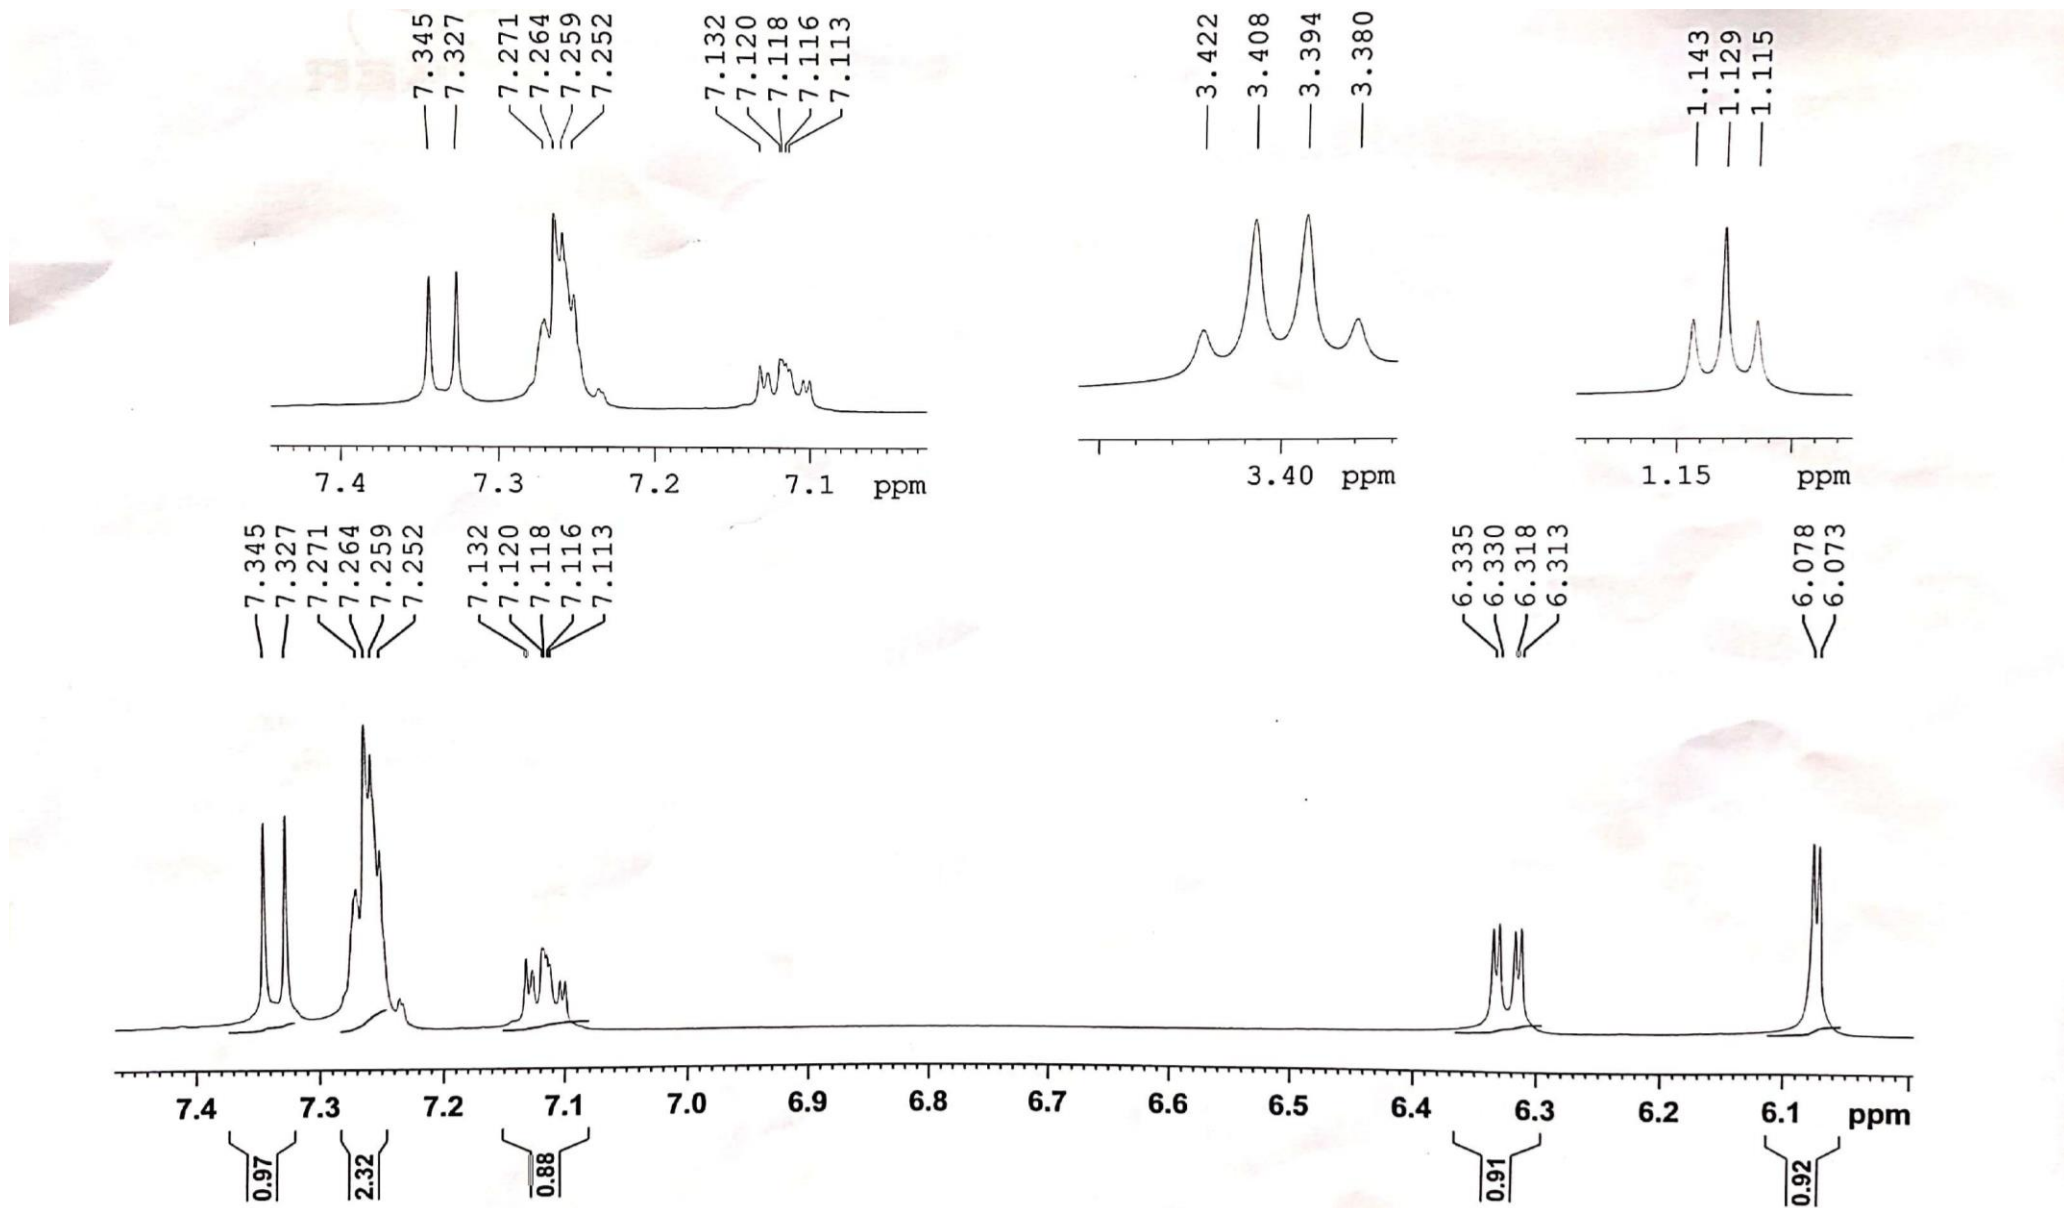

$^1\text{H-NMR}$  expanded spectrum of HSB-3

# HSB-4

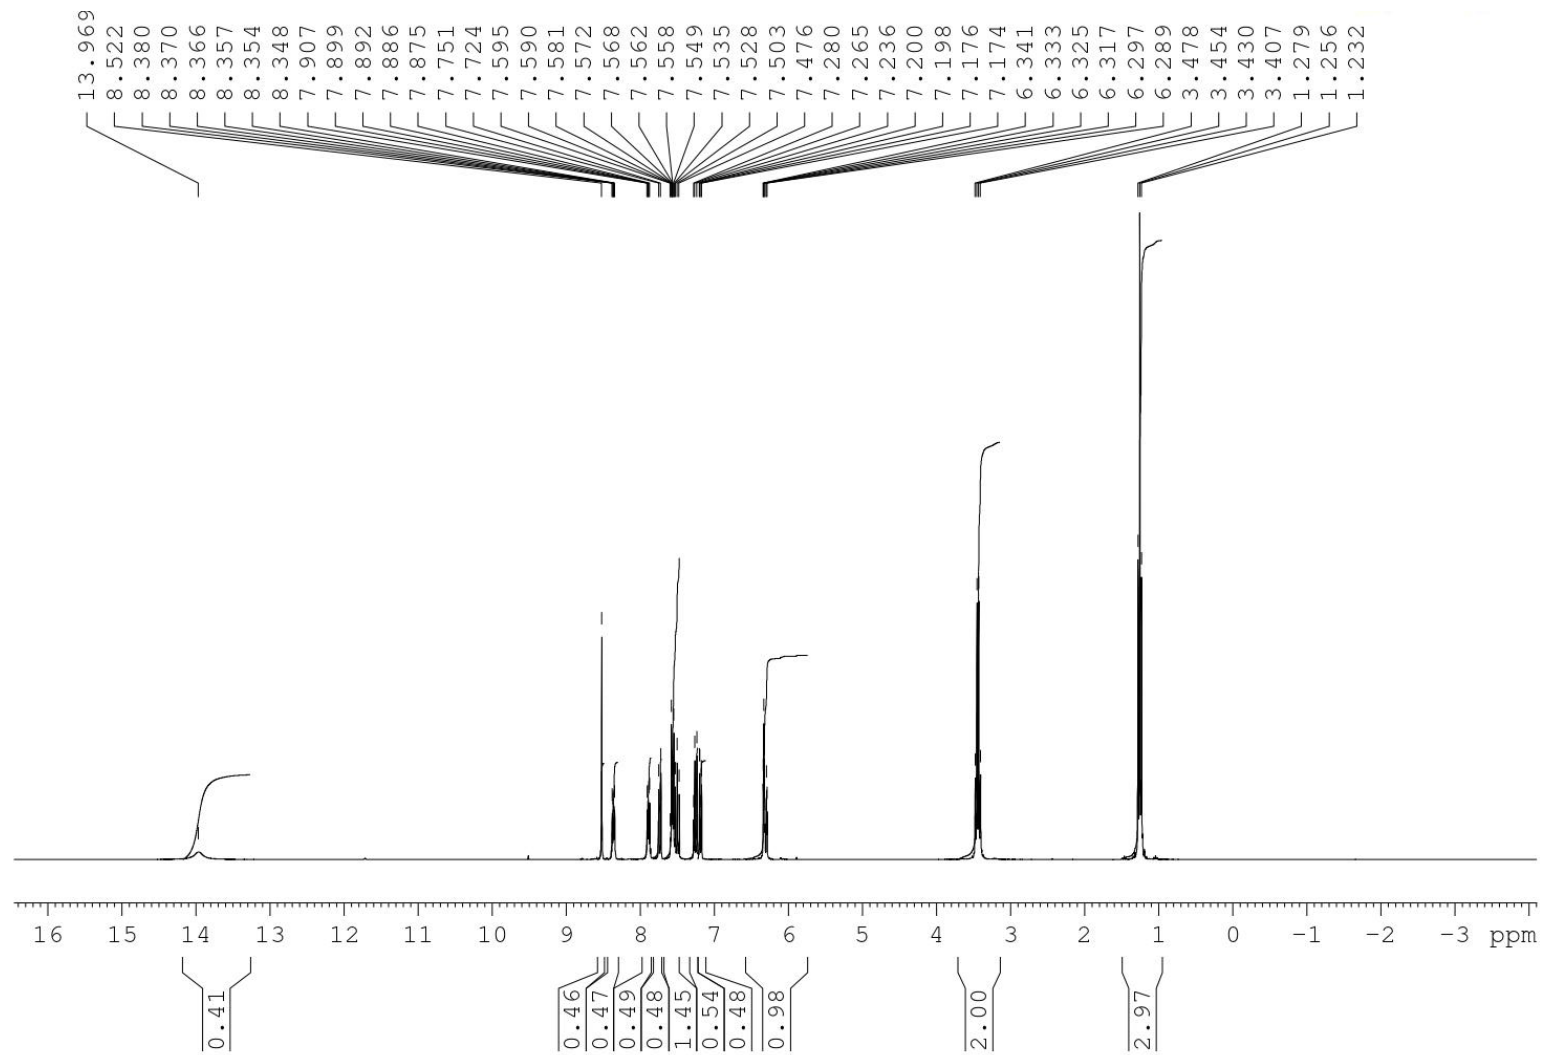

<sup>1</sup>H-NMR spectrum of HSB-4

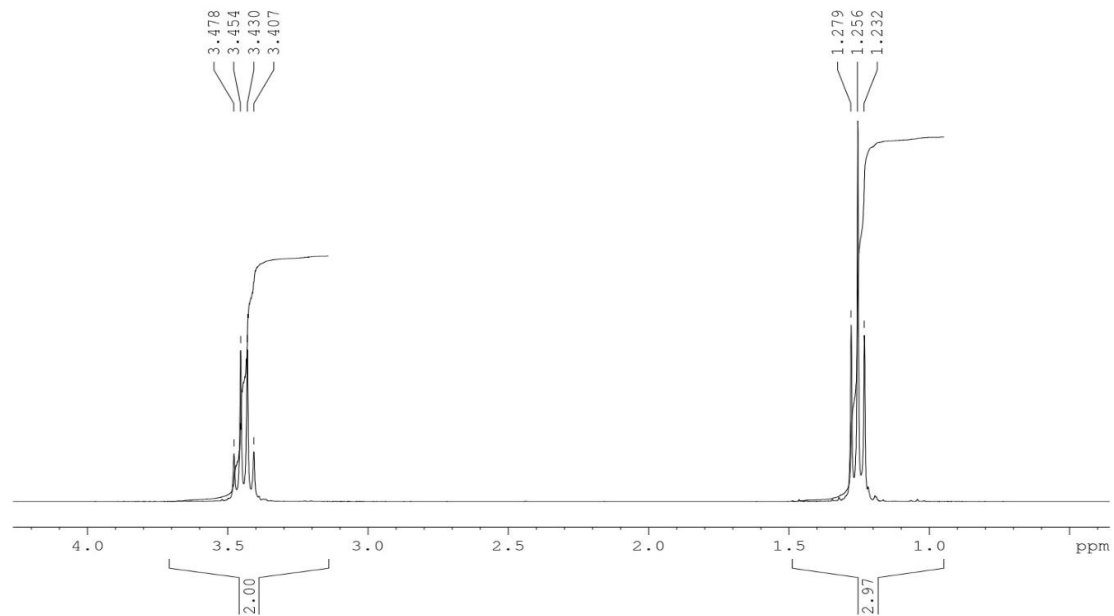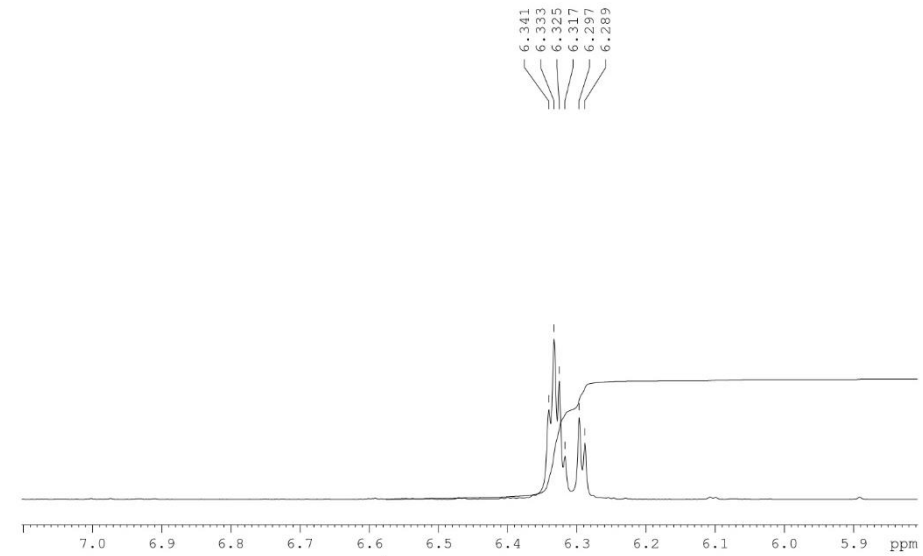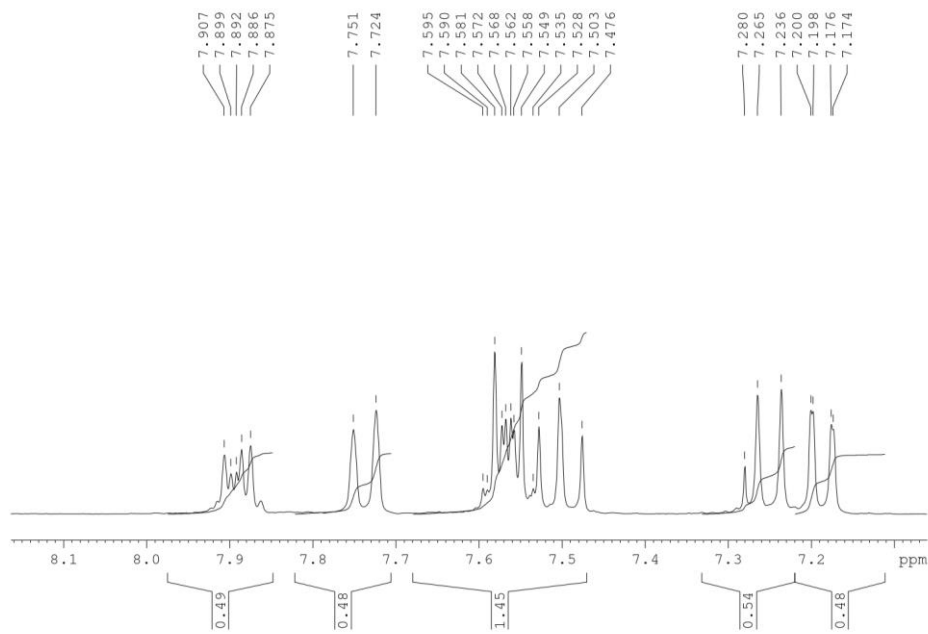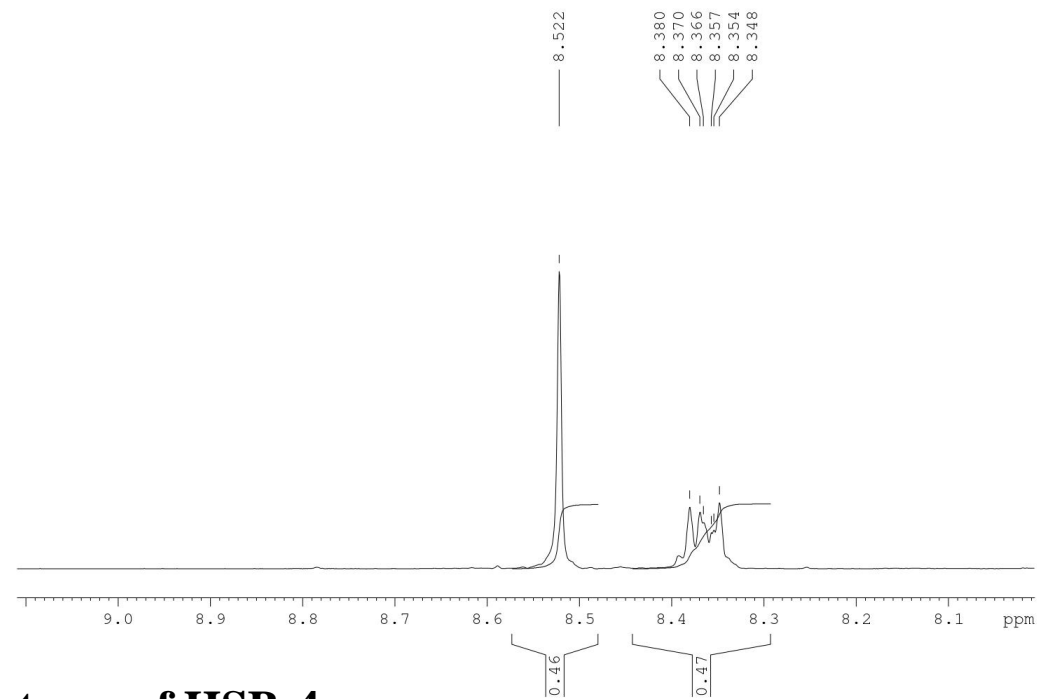

**<sup>1</sup>H-NMR expanded spectrum of HSB-4**

# HSB-5

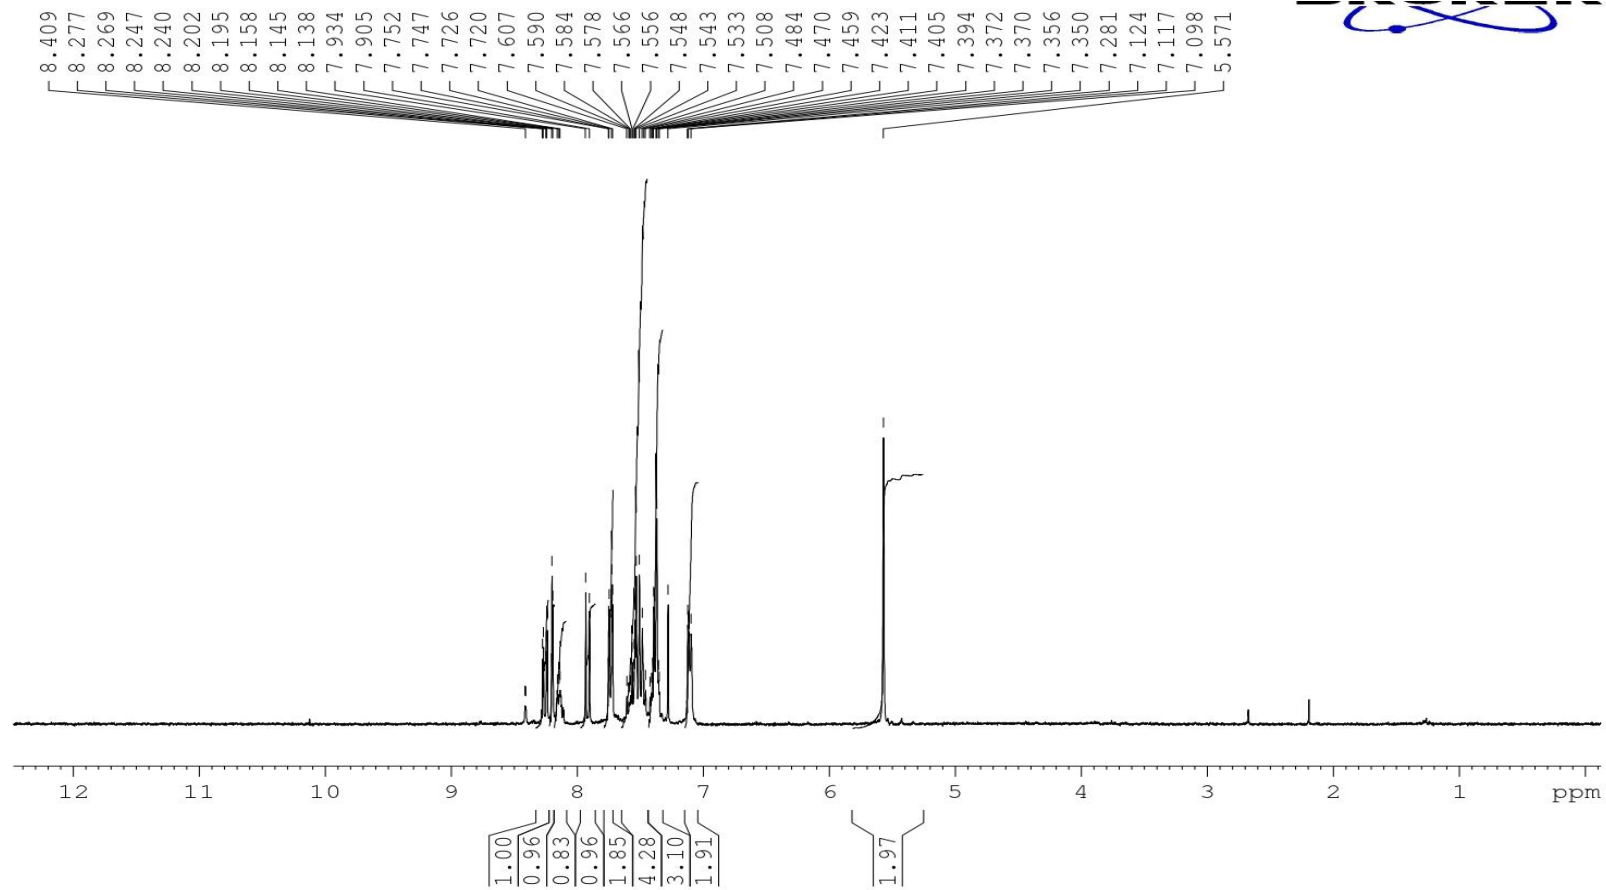

<sup>1</sup>H-NMR spectrum of HSB-5

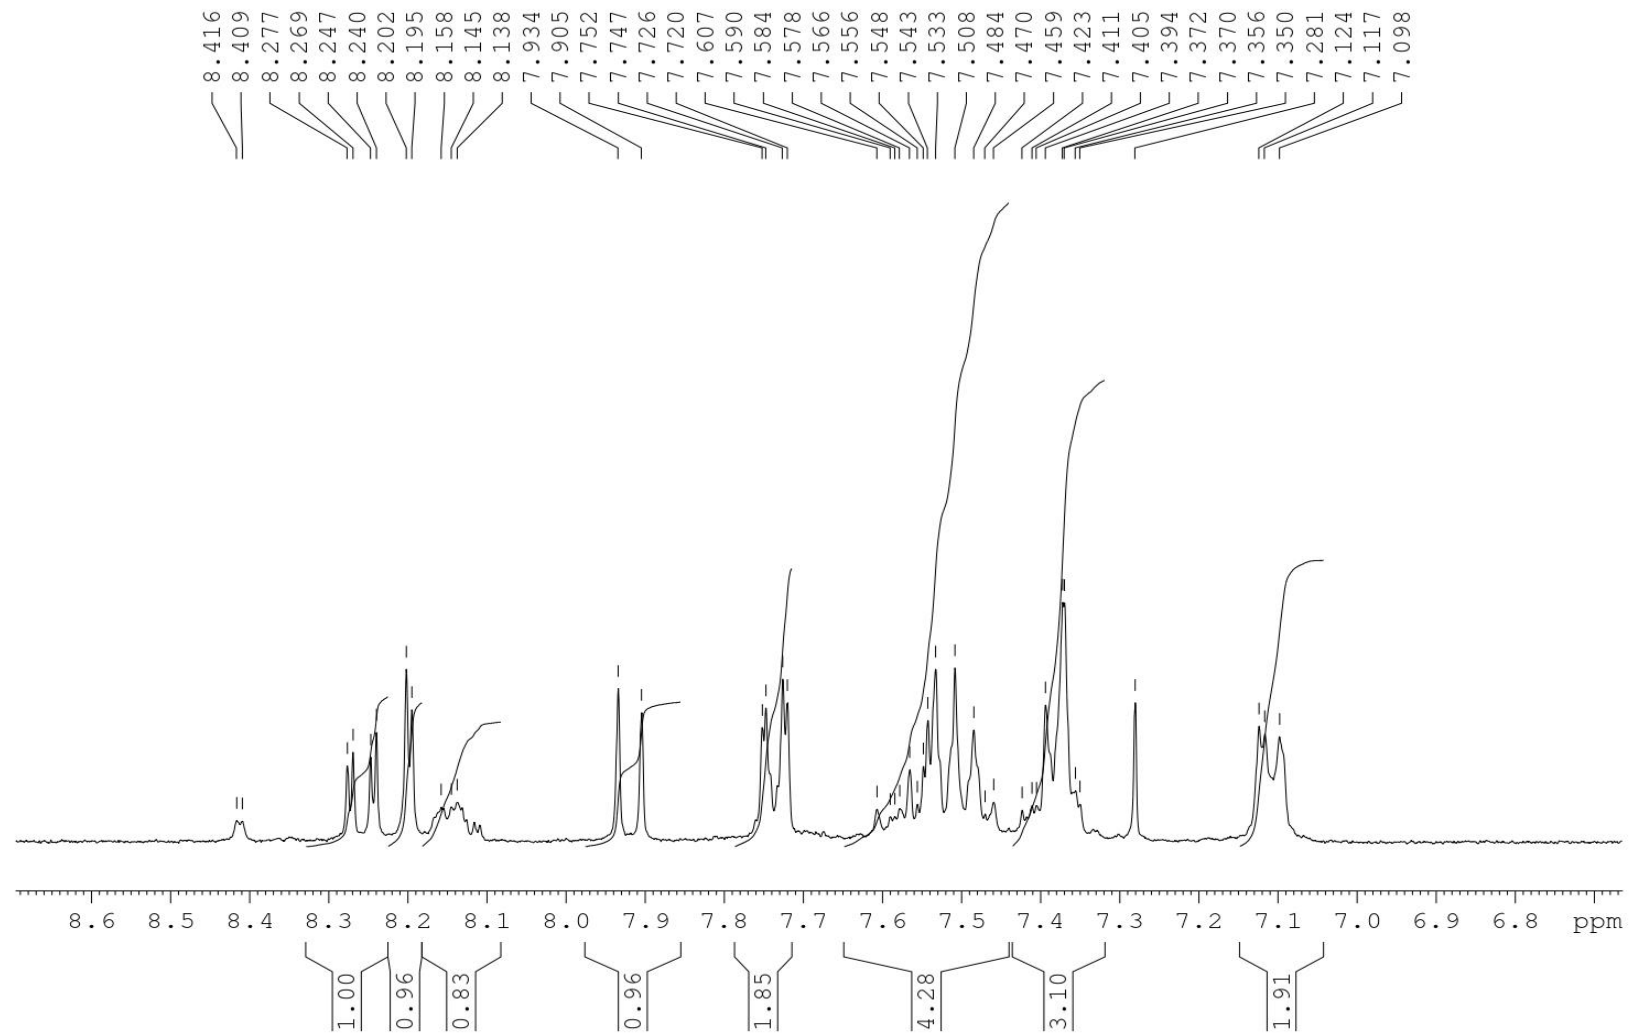

**<sup>1</sup>H-NMR expanded spectrum of HSB-5**



# HSB-6

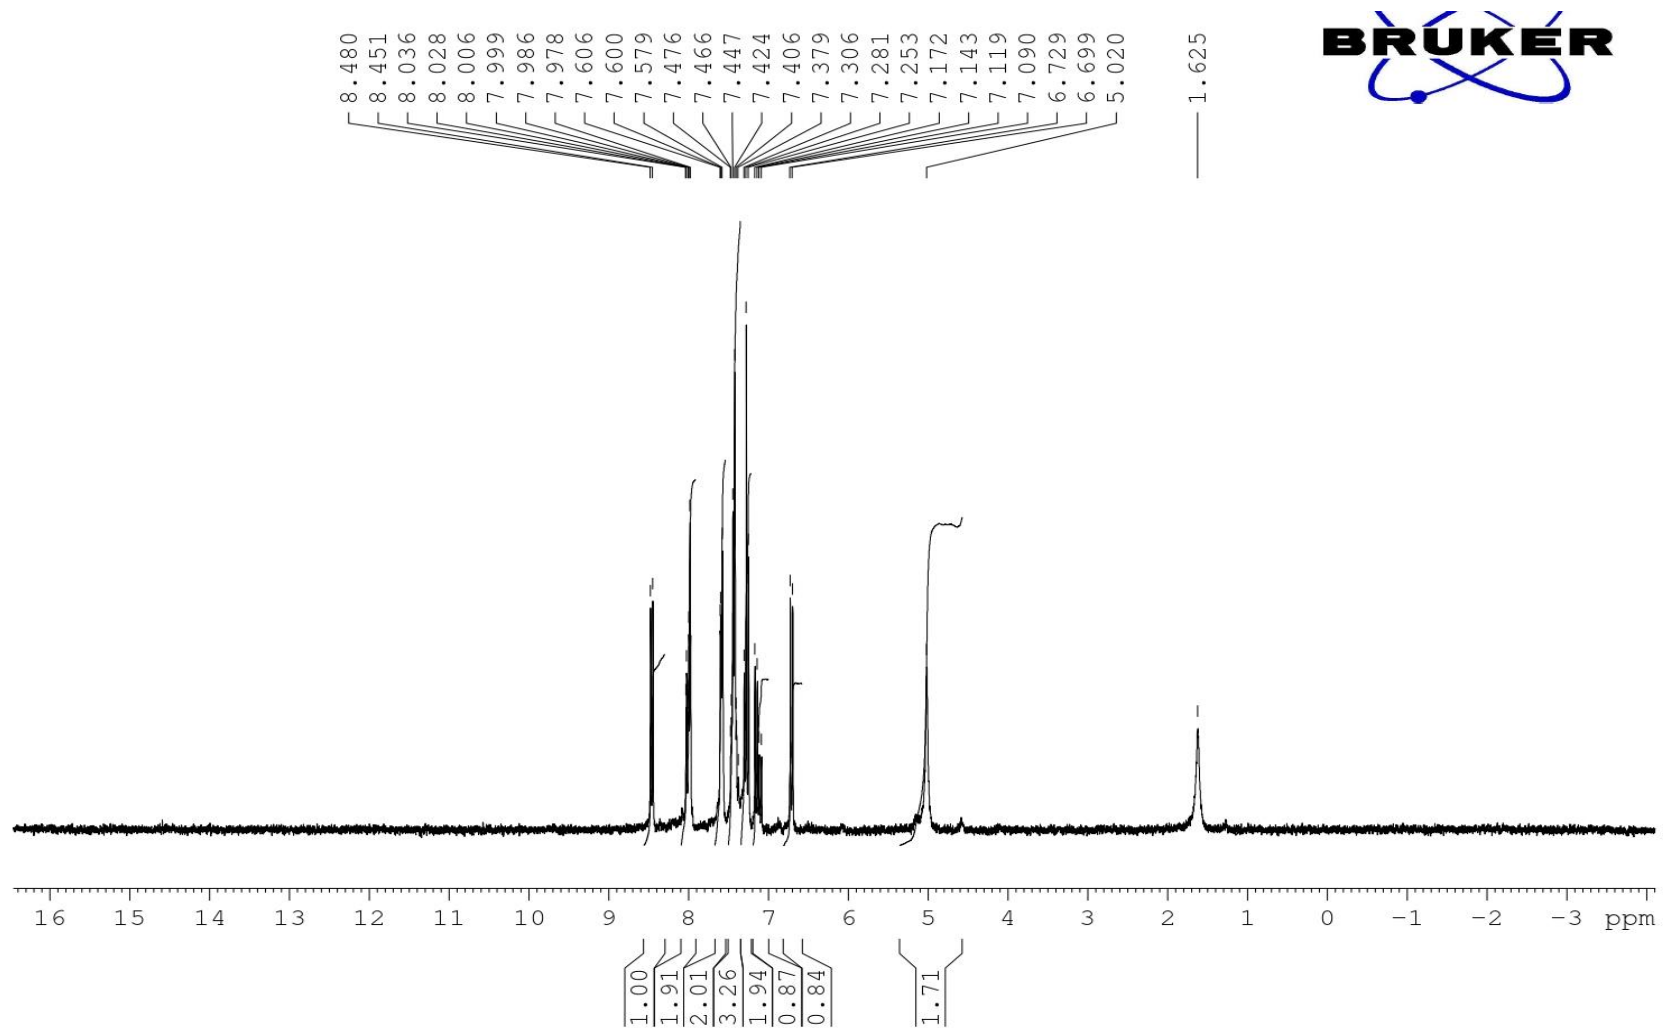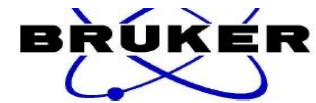

<sup>1</sup>H-NMR spectrum of HSB-6

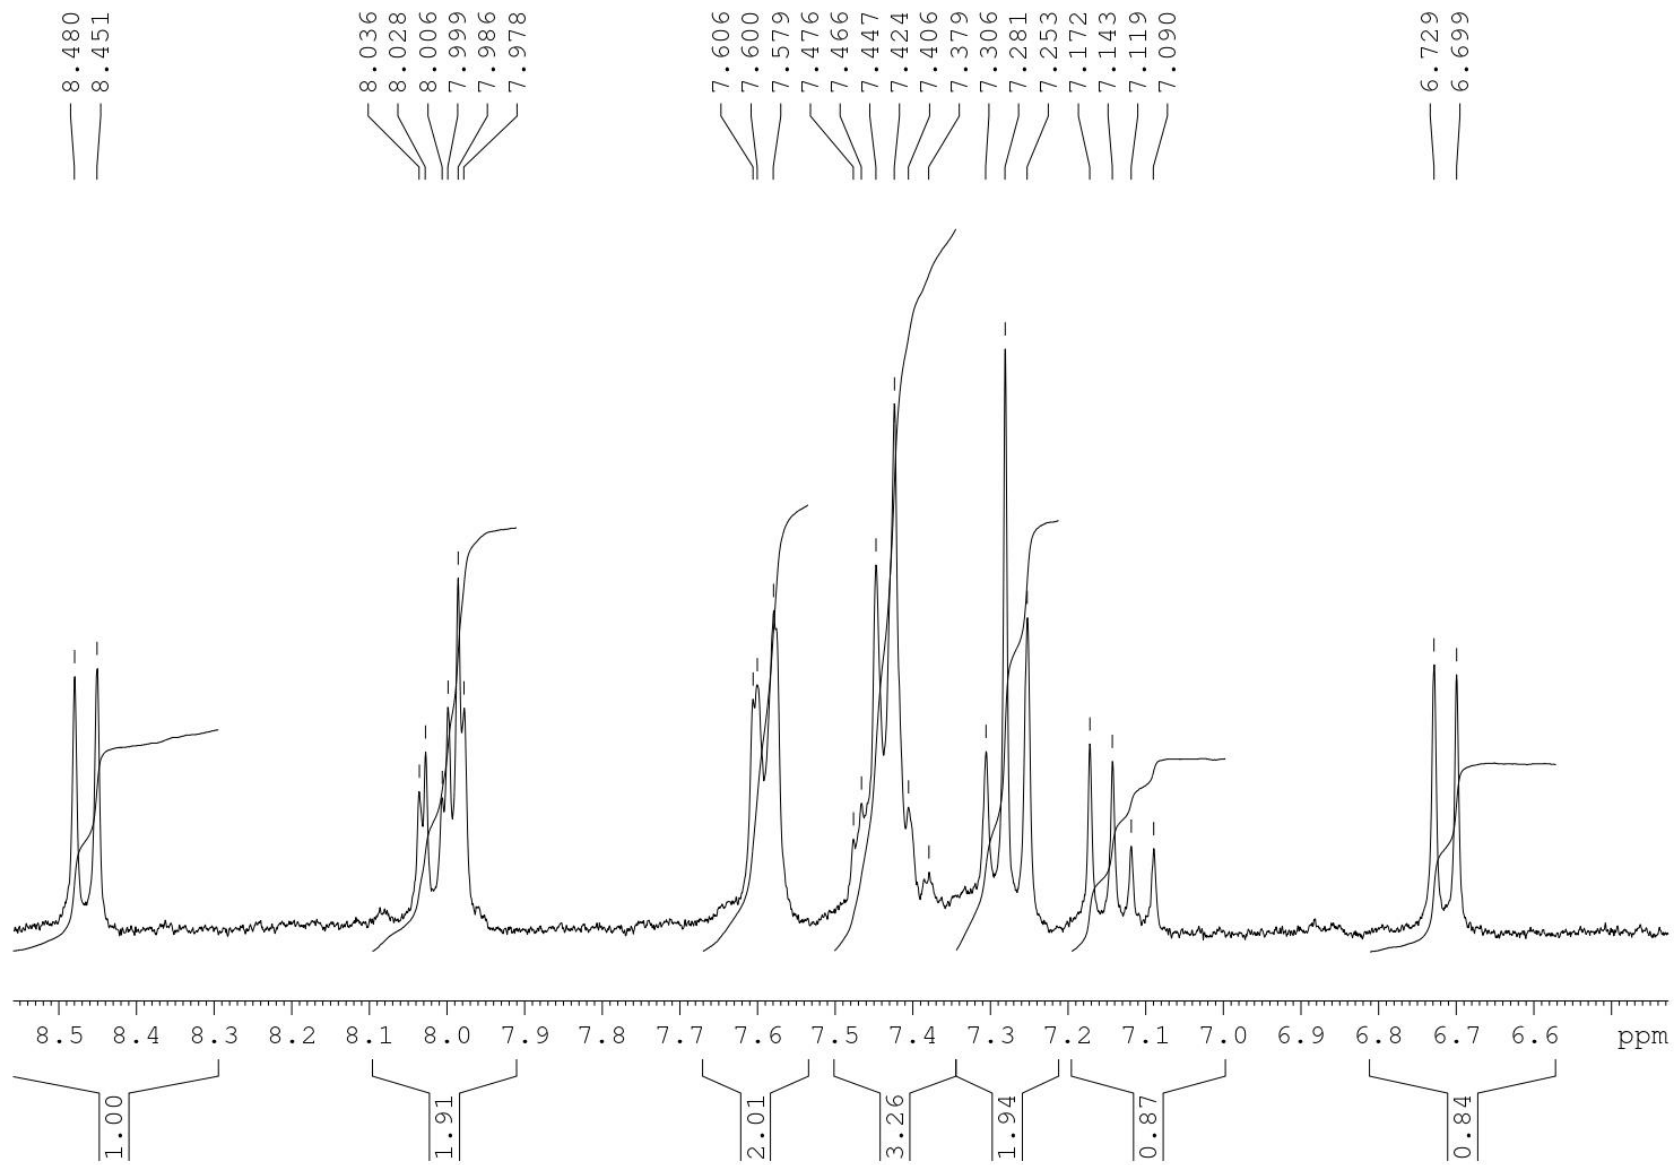

**$^1\text{H-NMR}$  expanded spectrum of HSB-6**
